# Supplementary material
Source: ML conference proceedings conference paper supplement (https://proceedings.mlr.press/v163/chatelain22a.html)
Supplement: Supplementary file [file chatelain22a-supp.pdf]

Table 1: Baselines

| Hyperparameter      | XXSmall  | XSmall   | Small    | Medium   |
|---------------------|----------|----------|----------|----------|
| Number of layers    | 3        | 6        | 12       | 24       |
| $d_{\text{model}}$  | 768      | 768      | 768      | 1024     |
| Attention heads     | 12       | 12       | 12       | 16       |
| Context size        | 1024     | 1024     | 1024     | 1024     |
| Dropout             | 0.1      | 0.1      | 0.1      | 0.1      |
| Attention dropout   | 0.1      | 0.1      | 0.1      | 0.1      |
| Total batch size    | 80       | 80       | 80       | 80       |
| Optimizer           | Adam     | Adam     | Adam     | Adam     |
| Peak learning rate  | $5e - 4$ | $5e - 4$ | $5e - 4$ | $3e - 4$ |
| Learning rate decay | cosine   | cosine   | cosine   | cosine   |
| Warmup tokens       | 409.6M   | 409.6M   | 409.6M   | 409.6M   |
| Decay tokens        | 32.8G    | 32.8G    | 32.8G    | 40.9G    |
| Max training tokens | 32G      | 32G      | 32G      | 32G      |
| Weight decay        | 0.0      | 0.0      | 0.0      | 0.0      |
| Gradient clipping   | 1.0      | 1.0      | 1.0      | 1.0      |

Table 2: Doped models

| Hyperparameter             | Doped XSmall | Doped Small | Doped Medium |
|----------------------------|--------------|-------------|--------------|
| Total number of layers     | 5            | 11          | 23           |
| Number of trainable layers | 3            | 6           | 12           |
| Number of frozen layers    | 2            | 5           | 11           |
| $d_{\text{model}}$         | 768          | 768         | 1024         |
| Attention heads            | 12           | 12          | 16           |
| Context size               | 1024         | 1024        | 1024         |
| Dropout                    | 0.1          | 0.1         | 0.1          |
| Attention dropout          | 0.1          | 0.1         | 0.1          |
| Total batch size           | 80           | 80          | 80           |
| Optimizer                  | Adam         | Adam        | Adam         |
| Peak learning rate         | $5e - 4$     | $5e - 4$    | $3e - 4$     |
| Learning rate decay        | cosine       | cosine      | cosine       |
| Warmup tokens              | 409.6M       | 409.6M      | 409.6M       |
| Decay tokens               | 32.8G        | 32.8G       | 40.9G        |
| Max training tokens        | 32G          | 32G         | 32G          |
| Weight decay               | 0.0          | 0.0         | 0.0          |
| Gradient clipping          | 1.0          | 1.0         | 1.0          |

## A Appendix

We include all the hyperparameter and architectural details for the baselines (Table 1), the doped models (Table 2, and the structured models (Table 3). The doped models are built by alternating trainable transformer and frozen MLP layers, so that the first and last layers of the models are always trainable.

Table 3: Structured Models

| Hyperparameter      | Structued Adaptive FastFood | Structued Block Diagonal |
|---------------------|-----------------------------|--------------------------|
| Number of layers    | 12                          | 12                       |
| $d_{\text{model}}$  | 1024                        | 1024                     |
| Attention heads     | 16                          | 16                       |
| Context size        | 1024                        | 1024                     |
| Dropout             | 0.1                         | 0.1                      |
| Attention dropout   | 0.1                         | 0.1                      |
| Total batch size    | 80                          | 80                       |
| Optimizer           | Adam                        | Adam                     |
| Peak learning rate  | $5e - 4$                    | $5e - 4$                 |
| Learning rate decay | cosine                      | cosine                   |
| Warmup tokens       | 409.6M                      | 409.6M                   |
| Decay tokens        | 32.8G                       | 40.9G                    |
| Max training tokens | 32G                         | 32G                      |
| Weight decay        | 0.0                         | 0.0                      |
| Gradient clipping   | 1.0                         | 1.0                      |
